# Supplementary material for: Characterization of Long-Time Series Variation of Glacial Lakes in Southwestern Tibet: A Case Study in the Nyalam County
Source: MDPI journal article supplement (doi:10.3390/rs14194688), 2022-09-20
Supplement: s1 [file s1]

## Supplementary Materials:

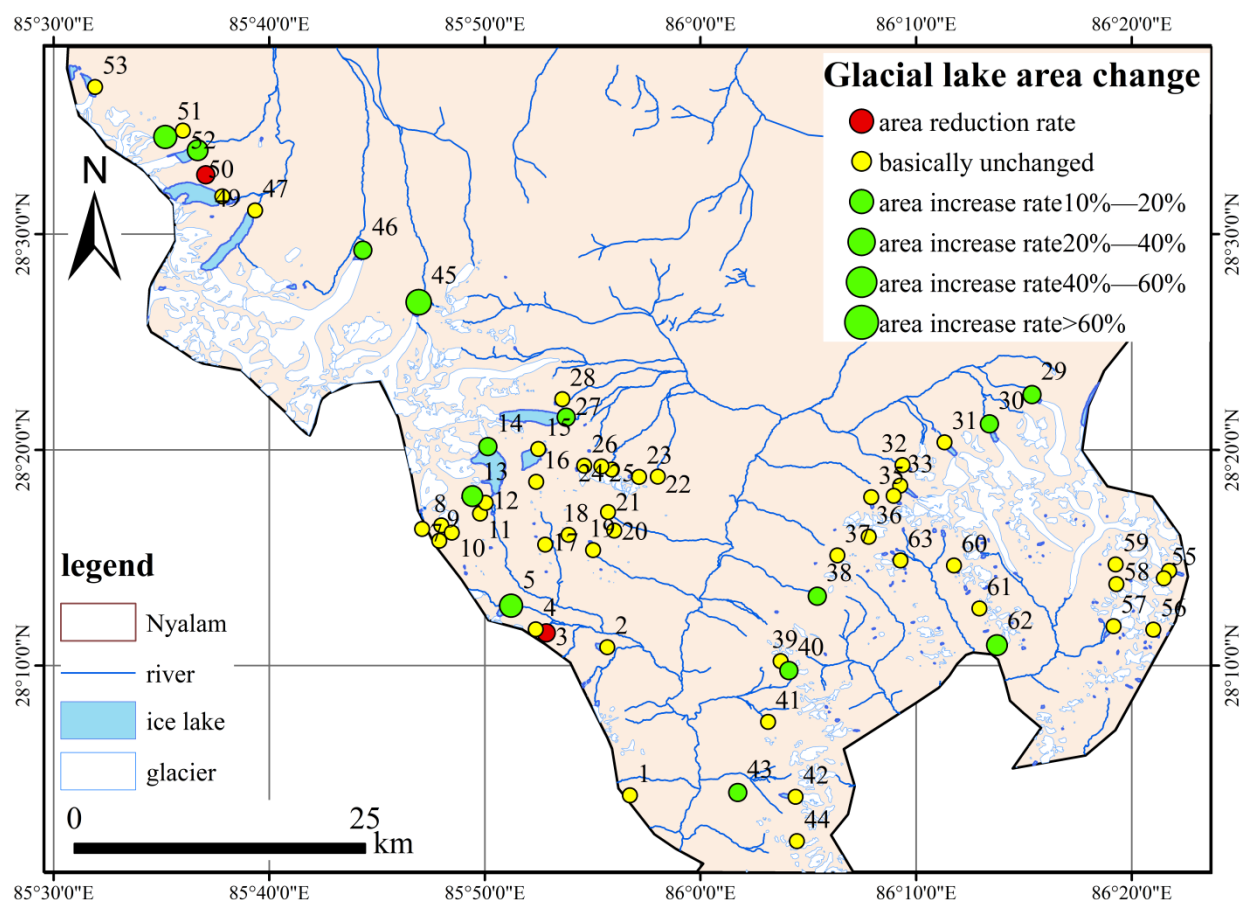

**Figure S1.** Glacial lake area change.

**Table S1.** Glacial lake change Information.

| No. | Name      | Catchment  | Mountain         | Latitude (N) | Longitude (E) | Elevation (m) | Classification       | Area in 2020 (km <sup>2</sup> ) | Area in 2010 (km <sup>2</sup> ) | Area in 2000 (km <sup>2</sup> ) | Area in 1990 (km <sup>2</sup> ) | Area increase (%) |
|-----|-----------|------------|------------------|--------------|---------------|---------------|----------------------|---------------------------------|---------------------------------|---------------------------------|---------------------------------|-------------------|
| 1   |           | Chongduipu | Central Himalaya | 28°03.97'    | 85°56.70'     | 4540          | Cirque lake          | 0.041                           | 0.037                           | 0.063                           | 0.069                           | -0.406            |
| 2   | Daroco    | Chongduipu | Central Himalaya | 28°11.00'    | 85°55.46'     | 4340          | Glacial erosion lake | 0.445                           | 0.451                           | 0.512                           | 0.516                           | -0.138            |
| 3   |           | Chongduipu | Central Himalaya | 28°11.65'    | 85°52.91'     | 4620          | Moraine dammed lake  | 0.017                           | 0.031                           | 0.045                           | 0.052                           | -0.673            |
| 4   |           | Chongduipu | Central Himalaya | 28°11.76'    | 85°52.41'     | 4620          | Moraine dammed lake  | 0.061                           | 0.053                           | 0.069                           | 0.072                           | -0.153            |
| 5   | Jialongco | Chongduipu | Central Himalaya | 28°12.85'    | 85°51.07'     | 4410          | Moraine dammed lake  | 0.629                           | 0.541                           | 0.213                           | 0.154                           | 3.084             |
| 6   |           | Chongduipu | Central Himalaya | 28°13.53'    | 85°48.24'     | 4740          | Moraine dammed lake  | 0.035                           | 0.032                           | 0.054                           | 0.056                           | -0.375            |
| 7   |           | Chongduipu | Central Himalaya | 28°16.35'    | 85°46.96'     | 5300          | Moraine dammed lake  | 0.073                           | 0.069                           | 0.079                           | 0.078                           | -0.064            |
| 8   |           | Chongduipu | Central Himalaya | 28°16.57'    | 85°47.90'     | 5380          | Moraine dammed lake  | 0.039                           | 0.036                           | 0.034                           | 0.030                           | 0.3               |

|    |          |            |                  |           |           |      |                      |       |       |       |       |        |
|----|----------|------------|------------------|-----------|-----------|------|----------------------|-------|-------|-------|-------|--------|
| 9  |          | Chongduipu | Central Himalaya | 28°14.43′ | 85°49.52′ | 5060 | U-type valley lake   | 0.051 | 0.051 | 0.051 | 0.051 | 0      |
| 10 |          | Chongduipu | Central Himalaya | 28°14.77′ | 85°48.96′ | 5100 | U-type valley lake   | 0.049 | 0.048 | 0.048 | 0.048 | 0.021  |
| 11 |          | Chongduipu | Central Himalaya | 28°17.24′ | 85°49.59′ | 5060 | Lateral moraine lake | 0.079 | 0.073 | 0.066 | 0.072 | 0.097  |
| 12 |          | Chongduipu | Central Himalaya | 28°17.68′ | 85°49.78′ | 5035 | Moraine dammed lake  | 0.257 | 0.206 | 0.222 | 0.229 | 0.122  |
| 13 | KungCo   | Chongduipu | Central Himalaya | 28°17.96′ | 85°49.38′ | 5120 | Moraine dammed lake  | 0.261 | 0.234 | 0.213 | 0.106 | 1.462  |
| 14 | Boqu     | Chongduipu | Central Himalaya | 28°18.73′ | 85°50.44′ | 5070 | Moraine dammed lake  | 5.254 | 4.713 | 3.138 | 2.149 | 1.445  |
| 15 | GongCo   | Chongduipu | Central Himalaya | 28°19.81′ | 85°52.16′ | 5170 | Glacial erosion lake | 2.012 | 2.080 | 2.216 | 2.293 | -0.123 |
| 16 |          | Chongduipu | Central Himalaya | 28°18.63′ | 85°52.30′ | 5300 | U-type valley lake   | 0.038 | 0.036 | 0.036 | 0.035 | 0.086  |
| 17 |          | Chongduipu | Central Himalaya | 28°15.70′ | 85°52.67′ | 5220 | Cirque lake          | 0.034 | 0.034 | 0.036 | 0.038 | -0.105 |
| 18 |          | Chongduipu | Central Himalaya | 28°16.15′ | 85°53.86′ | 5260 | U-type valley lake   | 0.038 | 0.040 | 0.058 | 0.061 | -0.377 |
| 19 |          | Karupu     | Central Himalaya | 28°15.61′ | 85°54.85′ | 5105 | U-type valley lake   | 0.325 | 0.329 | 0.322 | 0.333 | -0.024 |
| 20 |          | Gongbadang | Central Himalaya | 28°16.35′ | 85°55.81′ | 5300 | U-type valley lake   | 0.054 | 0.054 | 0.063 | 0.061 | -0.115 |
| 21 |          | Gongbadang | Central Himalaya | 28°17.23′ | 85°55.55′ | 5109 | Cirque lake          | 0.229 | 0.243 | 0.201 | 0.226 | 0.013  |
| 22 |          | Keyapu     | Central Himalaya | 28°18.90′ | 85°57.89′ | 5140 | Moraine dammed lake  | 0.082 | 0.085 | 0.082 | 0.078 | 0.051  |
| 23 |          | Keyapu     | Central Himalaya | 28°18.88′ | 85°56.85′ | 5200 | Moraine dammed lake  | 0.319 | 0.311 | 0.308 | 0.327 | -0.024 |
| 24 |          | Keyapu     | Central Himalaya | 28°19.30′ | 85°55.79′ | 5320 | Moraine dammed lake  | 0.084 | 0.105 | 0.092 | 0.101 | -0.168 |
| 25 |          | Keyapu     | Central Himalaya | 28°19.43′ | 85°55.47′ | 5340 | Moraine dammed lake  | 0.094 | 0.071 | 0.074 | 0.081 | 0.16   |
| 26 |          | Keyapu     | Central Himalaya | 28°19.47′ | 85°54.46′ | 5220 | Moraine dammed lake  | 0.131 | 0.113 | 0.133 | 0.137 | -0.044 |
| 27 | GangxiCo | Keyapu     | Central Himalaya | 28°21.59′ | 85°53.12′ | 5210 | Moraine dammed lake  | 4.635 | 4.547 | 3.306 | 2.579 | 0.797  |
| 28 | YinraCo  | Keyapu     | Central Himalaya | 28°22.35′ | 85°53.46′ | 5240 | Moraine dammed lake  | 0.257 | 0.232 | 0.246 | 0.253 | 0.016  |
| 29 |          | Rujiapu    | Central Himalaya | 28°22.68′ | 85°15.71′ | 5570 | Moraine dammed lake  | 0.236 | 0.209 | 0.192 | 0.121 | 0.95   |
| 30 |          | Rujiapu    | Central Himalaya | 28°21.11′ | 86°13.49′ | 5350 | Moraine dammed lake  | 0.535 | 0.463 | 0.375 | 0.287 | 0.864  |
| 31 |          | Rujiapu    | Central Himalaya | 28°20.34′ | 86°11.42′ | 5440 | Moraine dammed lake  | 0.514 | 0.519 | 0.534 | 0.561 | -0.084 |
| 32 |          | Rujiapu    | Central Himalaya | 28°19.16′ | 86°09.52′ | 5580 | Moraine dammed lake  | 0.189 | 0.021 | 0.196 | 0.193 | -0.021 |
| 33 |          | Tajilingpu | Central Himalaya | 28°18.23′ | 86°09.40′ | 5320 | Moraine dammed lake  | 0.532 | 0.506 | 0.501 | 0.554 | -0.04  |
| 34 |          | Tajilingpu | Central Himalaya | 28°17.59′ | 86°09.11′ | 5360 | Moraine dammed lake  | 0.147 | 0.135 | 0.129 | 0.137 | 0.073  |
| 35 |          | Tajilingpu | Central Himalaya | 28°17.49′ | 86°07.90′ | 5250 | Moraine dammed lake  | 0.199 | 0.214 | 0.205 | 0.194 | 0.026  |
| 36 |          | Duokapu    | Central Himalaya | 28°16.05′ | 86°07.61′ | 5540 | Moraine dammed lake  | 0.025 | 0.026 | 0.024 | 0.022 | 0.136  |
| 37 |          | Duokapu    | Central Himalaya | 28°15.08′ | 86°06.18′ | 5220 | Moraine dammed lake  | 0.141 | 0.127 | 0.133 | 0.135 | 0.044  |
| 38 |          | Yanggongpu | Central Himalaya | 28°12.47′ | 86°03.46′ | 4980 | Cirque lake          | 0.100 | 0.111 | 0.066 | 0.051 | 0.961  |
| 39 |          | Wuming     | Central Himalaya | 28°10.17′ | 86°03.55′ | 5180 | Moraine dammed lake  | 0.040 | 0.038 | 0.037 | 0.039 | 0.026  |
| 40 |          | Wuming     | Central Himalaya | 28°09.82′ | 86°04.00′ | 5140 | Moraine dammed lake  | 0.009 | 0.008 | 0.006 | 0.005 | 0.8    |

|    |               |                  |           |           |      |                     |       |       |       |       |        |
|----|---------------|------------------|-----------|-----------|------|---------------------|-------|-------|-------|-------|--------|
| 41 | Wuming        | Central Himalaya | 28°09.71' | 86°04.20' | 5160 | Moraine dammed lake | 0.012 | 0.011 | 0.011 | 0.009 | 0.333  |
| 42 | Wuming        | Central Himalaya | 28°07.43' | 86°03.16' | 4380 | Moraine dammed lake | 0.008 | 0.006 | 0.007 | 0.007 | 0.143  |
| 43 | Zhangzangpu   | Central Himalaya | 28°04.62' | 86°03.91' | 4720 | Moraine dammed lake | 0.266 | 0.260 | 0.184 | 0.117 | 1.274  |
| 44 | Zhangzangpu   | Central Himalaya | 28°04.08' | 86°01.72' | 4500 | Cirque lake         | 0.042 | 0.042 | 0.042 | 0.042 | 0      |
| 45 | Sunkexi river | Central Himalaya | 28 26.58  | 85 46.94  | 5580 | Moraine dammed lake | 0.452 | 0.273 | 0.184 | 0.096 | 3.708  |
| 46 | Sunkexi river | Central Himalaya | 28 28.91  | 85 44.17  | 5340 | supraglacial lake   | 0.379 | 0.214 | 0.241 | 0.204 | 0.858  |
| 47 | Sunkexi river | Central Himalaya | 28 29.43  | 85 38.34  | 5280 | Moraine dammed lake | 4.739 | 4.772 | 4.665 | 4.636 | 0.022  |
| 48 | Sunkexi river | Central Himalaya | 28 32.36  | 85 36.58  | 5365 | Moraine dammed lake | 5.217 | 5.067 | 5.049 | 4.903 | 0.064  |
| 49 | Sunkexi river | Central Himalaya | 28 32.73  | 85 36.98  | 5440 | Moraine dammed lake | 0.051 | 0.193 | 0.162 | 0.164 | -0.689 |
| 50 | Sunkexi river | Central Himalaya | 28 33.75  | 85 35.55  | 5360 | Moraine dammed lake | 1.357 | 0.809 | 0.679 | 0.539 | 1.518  |
| 51 | Sunkexi river | Central Himalaya | 28 34.52  | 85 35.19  | 5450 | Moraine dammed lake | 0.212 | 0.096 | 0.122 | 0.051 | 3.157  |
| 52 | Sunkexi river | Central Himalaya | 28 34.67  | 85 35.76  | 5420 | Moraine dammed lake | 0.242 | 0.255 | 0.228 | 0.235 | 0.03   |
| 53 | Sunkexi river | Central Himalaya | 28 36.55  | 85 31.67  | 5100 | Moraine dammed lake | 0.983 | 0.882 | 0.797 | 0.741 | 0.327  |
| 54 | Kidibu Khola  | Central Himalaya | 28 14.26  | 86 22.17  | 5310 | Moraine dammed lake | 0.262 | 0.249 | 0.235 | 0.223 | 0.175  |
| 55 | Kidibu Khola  | Central Himalaya | 28 14.10  | 86 21.38  | 5400 | Moraine dammed lake | 0.078 | 0.078 | 0.079 | 0.075 | 0.04   |
| 56 | Kidibu Khola  | Central Himalaya | 28 11.53  | 86 20.96  | 5315 | Moraine dammed lake | 0.189 | 0.176 | 0.186 | 0.200 | -0.055 |
| 57 | Kidibu Khola  | Central Himalaya | 28 11.47  | 86 18.81  | 5290 | Moraine dammed lake | 0.248 | 0.245 | 0.271 | 0.252 | -0.016 |
| 58 | Kidibu Khola  | Central Himalaya | 28 13.70  | 86 19.28  | 5255 | Moraine dammed lake | 0.066 | 0.064 | 0.069 | 0.067 | -0.015 |
| 59 | Kidibu Khola  | Central Himalaya | 28 13.69  | 86 19.21  | 5365 | Moraine dammed lake | 0.205 | 0.219 | 0.239 | 0.216 | -0.051 |
| 60 | Kidibu Khola  | Central Himalaya | 28 14.72  | 86 11.68  | 5310 | Moraine dammed lake | 0.148 | 0.161 | 0.153 | 0.182 | -0.187 |
| 61 | Kidibu Khola  | Central Himalaya | 28 12.63  | 86 12.82  | 5400 | Moraine dammed lake | 0.042 | 0.041 | 0.045 | 0.051 | -0.176 |
| 62 | Kidibu Khola  | Central Himalaya | 28 10.96  | 86 13.53  | 5170 | Moraine dammed lake | 0.092 | 0.089 | 0.061 | 0.031 | 1.968  |
| 63 | Kidibu Khola  | Central Himalaya | 86 09.033 | 28 14.96  | 5335 | Moraine dammed lake | 0.119 | 0.119 | 0.109 | 0.104 | 0.144  |

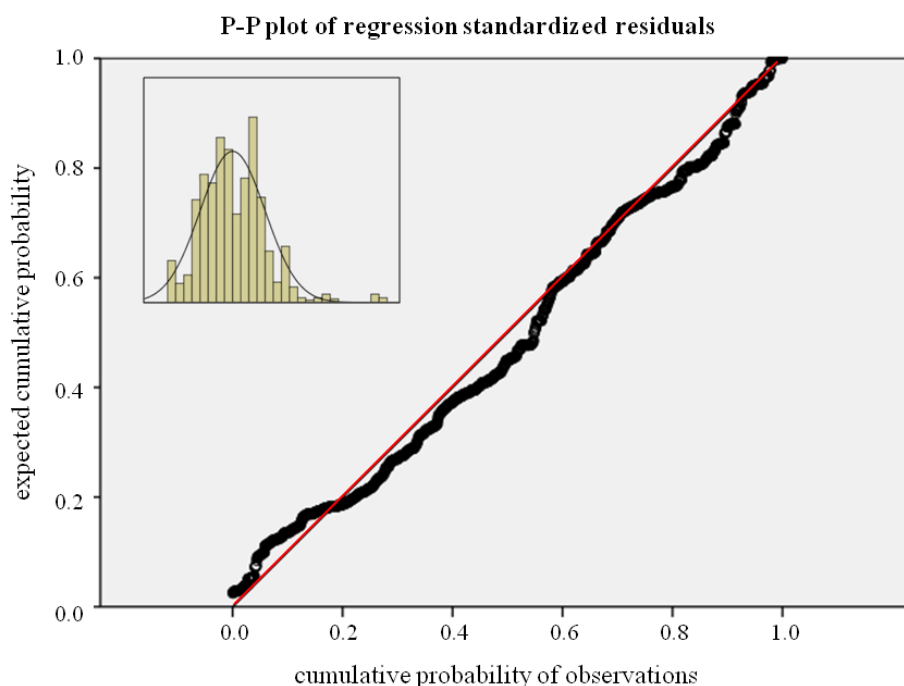

**Figure S2.** Standard P-P plot of regression standardized residuals.

**Table S2.** Since the 20th century, the outburst of the Glacier Lake in Nyalam County, Tibet, China.

| No. | Location | Latitude | Longitude | Name      | Collapse Date | Altitude/m |
|-----|----------|----------|-----------|-----------|---------------|------------|
| 1   | Nyalam   | 28.29    | 86.13     | Taraco    | 1935.8.28     | 5250       |
| 2   | Nyalam   | 28.08    | 86.07     | Cirenmaco | 1964          | 4660       |
| 3   | Nyalam   | 28.08    | 86.07     | Cirenmaco | 1981.7.11     | 4660       |
| 4   | Nyalam   | 28.21    | 85.85     | Jialongco | 2002.5.23     | 4410       |
| 5   | Nyalam   | 28.21    | 85.85     | Jialongco | 2002.6.29     | 4410       |
| 6   | Nyalam   | 28.08    | 86.06     | Cirenmaco | 2016.7.5      | 4610       |
| 7   | Nyalam   | 28.21    | 85.85     | Jialongco | 2020.6.26     | 4410       |
| 8   | Nyalam   | 28.18    | 85.93     | DareCo    |               | 4340       |

The accuracy evaluation of the confusion matrix is mainly used to compare the classification results with the actual measured values. The accuracy of the classification results can be displayed in a confusion matrix. Each column represents the predicted value, that is, the glacial lake extracted in this paper, and each row represents the actual value, that is, the glacial lake in the HMA Glacial Lake Inventory (Hi-MAG) database. In the table S3, 1 refers to the grid pixel value of the non-glacial lake type in the study area, and 2 refers to the grid pixel value of the glacial lake type in the study area. By comparing the position and classification of each measured pixel with the corresponding position and classification results in the classified image, the Kappa coefficient finally obtained by calculation is 0.90.

Data set: Annual 30-meter Dataset for Glacial Lakes in High Mountain Asia from 2008 to 2017 (DOI:10.5194/essd-2020-57)

**Table S3.** The Confusion Matrix for the extraction accuracy of Glacial Lake.

| Forecast Grid     | Reference Grid |                   | Sum         |
|-------------------|----------------|-------------------|-------------|
|                   | 1              | 2                 |             |
| 1                 | 62615          | 141               | 62756       |
| 2                 | 86             | 618               | 704         |
| Sum               | 62701          | 759               | 63360       |
| Producer Accuracy | 99.86%         | 81.42%            |             |
| User Accuracy     | 99.78%         | 87.78%            |             |
|                   |                | Kappa Coefficient | 0.898260375 |
